# Supplementary material for: Toward a mechanistic understanding of DNA binding by forkhead transcription factors and its perturbation by pathogenic mutations
Source: PubMed Central journal article supplement — Nucleic Acids Res. 2021 Sep 22;49(18):10235–49. doi: 10.1093/nar/gkab807 (PMC8501956; doi:10.1093/nar/gkab807), 2021-09-22
Supplement: gkab807_supplemental_file.pdf [file gkab807_supplemental_file.pdf]

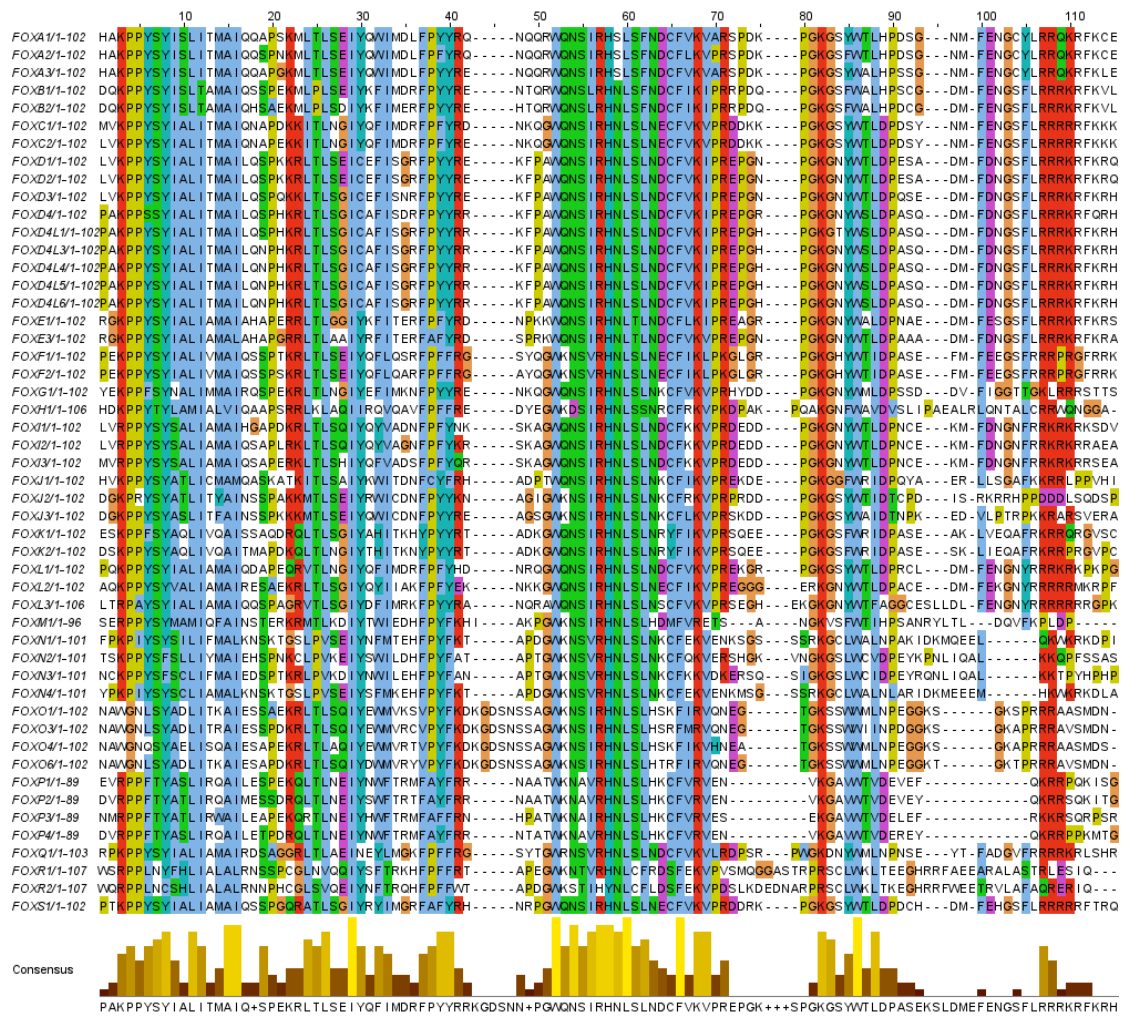

**Figure S1. Multiple sequence alignment of human forkhead domain.** The protein sequences were aligned using Clustal Omega webserver (<https://www.ebi.ac.uk/Tools/msa/clustalo/>). The alignment was presented by Jalview. Residue color coding: blue, hydrophobic residues; red, positively charged residues; magenta, negatively charged residues; green, polar residues; orange, glycines; yellow, prolines; cyan, aromatic residues; and white, unconserved residues.

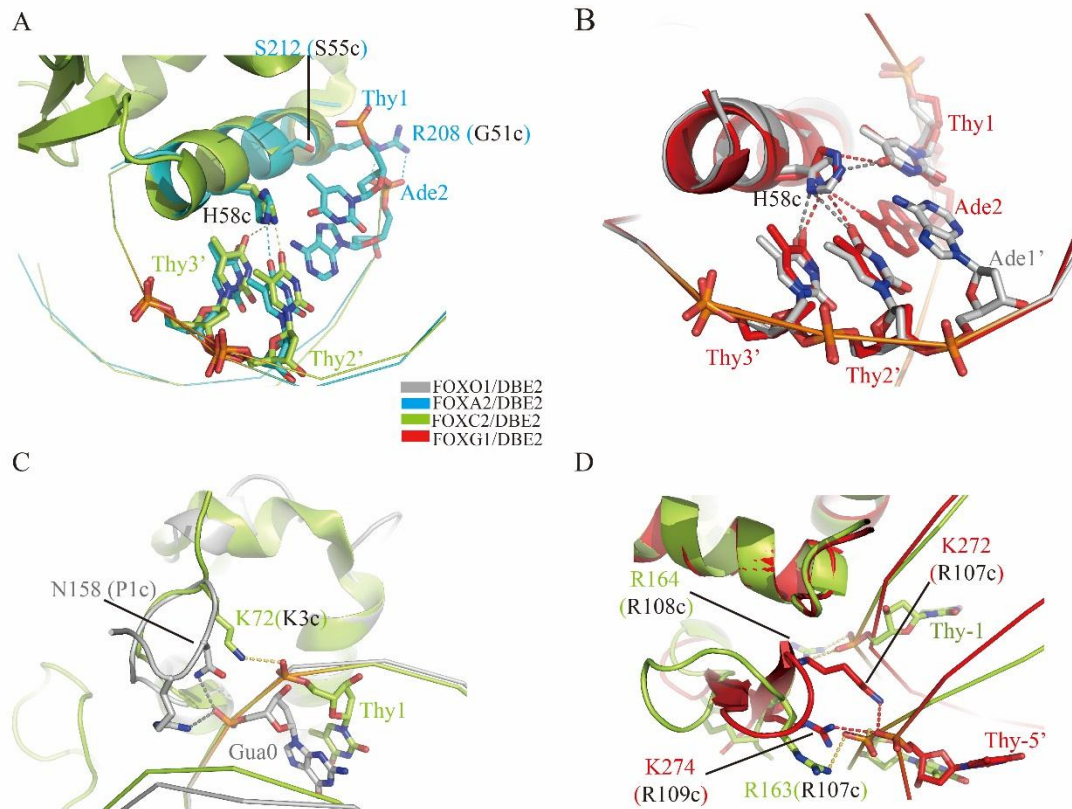

**Figure S2. Comparison of different FOX DBDs binding to the same DNA site.** (A) H3 helix-DNA contacts in the FOXA2 (cyan) and FOXC2 (green) structures. (B) H3 helix-DNA contacts in the FOXO1 (gray) and FOXG1 (red) structures. (C) protein-DNA interaction in the N termini of FOXO1 and FOXC2 DBDs. (D) DNA recognition of the FOXC2 and FOXG1 wing2 regions. Corresponding residues in the FKH consensus are shown in Parentheses.

**Table S1. List of identified DBD mutations of selected FOX proteins.**

| Protein      | Mutation    | PubMed ID          | COSMIC accession number    |
|--------------|-------------|--------------------|----------------------------|
| <b>FOXA1</b> | P171S       | 28481359, 28825054 | COSV51647442               |
|              | S174L       | N/A                | COSV99163462               |
|              | Y175C       | 30205045           | COSV51647165               |
|              | I176V/M     | 29807833, 30537512 | COSV51644739, COSV51646232 |
|              | P205L       | 26214590           | COSV51649162               |
|              | Y207H       | N/A                | COSV99163432               |
|              | R213H/C     | 27103403           | COSV51649232, COSV99163750 |
|              | W214C       | 30181556           | COSV51646120               |
|              | S217C       | 31243370           | COSV99163604               |
|              | R219S/C     | 24823478, 26542946 | COSV51647749, COSV51646097 |
|              | H220Q       | N/A                | COSV99163516               |
|              | F224L       | 27148695           | COSV51645367               |
|              | D226G/N/V/E | 22610119, 27135926 | COSV51643222               |
|              | V229I       | N/A                | COSV51646752               |
|              | V231A       | N/A                | COSV99163547               |
|              | A232V/S     | 22610119           | COSV99163540               |
|              | K237R       | N/A                | COSV99163230               |
|              | P238S       | N/A                | COSV104565547              |
|              | G239S       | 29807833           | COSV99163640               |
|              | G241S       | 27890785           | COSV51644269, COSV51645075 |
|              | Y243S       | N/A                | COSV51644631               |
|              | H247Q/R/Y   | 26000489           | COSV51645490, COSV51644535 |
|              | D249G/V     | 30181556           | COSV51643974               |
|              | S250F/Y     | 30531871, 30205045 | COSV51644190, COSV51646200 |
|              | M253K       | 22610119, 26542946 | COSV51647482               |
|              | F254V/S/L   | 26000489, 30181556 | COSV51644341, COSV51647202 |
|              | Y259C       | 26000489           | COSV51644341               |
|              | R261G/C     | 26928463, 30181556 | N/A                        |
| F266C/S/L    | 27103403    | N/A                |                            |
| <b>FOXC1</b> | P79L/T/R    | 14506133           | N/A                        |
|              | S82T        | 11179011           | N/A                        |
|              | A85T/P      | 32631953           | COSV66515893               |
|              | L86F/P      | 14578375           | N/A                        |
|              | I87M        | 11179011           | N/A                        |
|              | I91T/S      | 14506133           | N/A                        |
|              | M109V/I     | 29487724           | COSV66516385               |
|              | F112S/I     | 11179011           | COSV101083228              |
|              | Y115S       | 16936096           | N/A                        |
|              | I126M/S     | 11179011           | N/A                        |
|              | R127H/L     | 14506133           | N/A                        |
|              | L130F/P     | 17210863           | COSV66516720               |

|              |                    |                    |                            |
|--------------|--------------------|--------------------|----------------------------|
|              | S131L/W/           | 11179011           | COSV66516570               |
|              | C135Y/R            | 15277473           | COSV66516241               |
|              | K138E/N            | 29487724           | COSV101083299              |
|              | G149D              | 32631953           | COSV101083387              |
|              | W152G              | 19279310           | N/A                        |
|              | M161K/V            | 15277473           | N/A                        |
|              | G165R              | 15277473           | N/A                        |
|              | R169P/W            | 15277473           | COSV66515642               |
|              | R170W              | 32631953           | N/A                        |
| <b>FOXG1</b> | K181N              | 26938784, 25741868 | N/A                        |
|              | P183L              | 26804919           | COSV57397623               |
|              | F184L              | N/A                | COSV57399493               |
|              | S185T/I            | 25741868           | N/A                        |
|              | N187K              | 25356970           | N/A                        |
|              | A188V/T            | 23525077, 22895190 | COSV57395156, COSV57398945 |
|              | A193T              | 27267998           | COSV100486832              |
|              | R195W              | N/A                | COSV100487048              |
|              | G206S              | 27149842           | COSV57397070               |
|              | E209G              | N/A                | COSV100486593              |
|              | F210L              | N/A                | COSV57399812               |
|              | F215S              | 19578037, 18414213 | N/A                        |
|              | G224C              | 21270142           | N/A                        |
|              | I229L              | 25741868           | N/A                        |
|              | R230H/L            | 22810696, 22129046 | COSV57398603, COSV5739696  |
|              | N232D/Y            | 25741868           | N/A                        |
|              | S234P              | 21441262           | COSV57395902               |
|              | L235F              | 26168399           | COSV57397834               |
|              | C238Y              | N/A                | COSV57397792               |
|              | V242M              | 25344691           | COSV57399961               |
|              | R244S              | 25741868           | COSV57398832               |
|              | G252V              | 18414213           | N/A                        |
|              | N253D              | 21441262, 18414213 | N/A                        |
|              | F265L              | 26873401           | COSV57400212               |
|              | G267S              | 18414213           | COSV100487141              |
|              | G271D              | N/A                | COSV57397176               |
| R274Q/W      | N/A                | COSV57395324       |                            |
| R275H/P      | 26071483, 27149842 | COSV57394796       |                            |
| <b>FOXP3</b> | R337Q              | 18931102           | COSV66052168               |
|              | P339A              | 18931102           | N/A                        |
|              | A343T              | 11137992           | N/A                        |
|              | R347H              | 18951619           | COSV66051279               |
|              | I363V              | 11768393           | N/A                        |
|              | H365N/Q            | 27149842           | COSV100873129              |

|  |         |          |               |
|--|---------|----------|---------------|
|  | F367L/C | 18820676 | N/A           |
|  | R369C   | 30709738 | COSV100873061 |
|  | M370L   | 21595732 | N/A           |
|  | F371C   | 11137992 | COSV100873291 |
|  | F373A/V | 28778586 | N/A           |
|  | F374Y/V | 28296713 | COSV66051770  |
|  | T380I   | 18316354 | N/A           |
|  | A384T   | 11137992 | N/A           |
|  | R386H   | 20650610 | COSV105319177 |
|  | S390N   | 16371377 | N/A           |
|  | R397W/Q | 11295725 | COSV66050988  |
|  | V405G   | N/A      | COSV100873195 |
|  | V408M   | 18931102 | N/A           |
|  | D409G   | 16990602 | N/A           |
|  | L411P   | N/A      | COSV100873211 |
|  | R417W   | 27149842 | COSV66050838  |

N/A stands for not available.
